# Supplementary material for: MAGEH1 interacts with GADD45G and induces renal tubular cell apoptosis
Source: PubMed Central journal article supplement (PMC8598065; doi:10.1371/journal.pone.0260135), 2021-11-17
Supplement: pone.0260135.s002.pdf [file pone.0260135.s002.pdf]

ECL 10sec \*size 17kDa

Fig 2

Ad-GADD45G

"HRE+Virus" 250

MOI

0 63 125 250 250 X

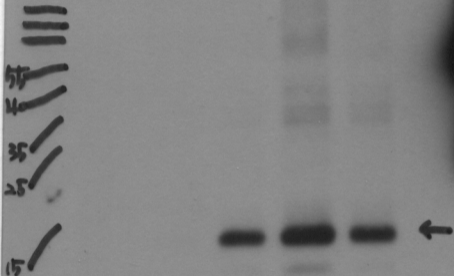

17kDa

1'Ab GADD (M) 1:200

2'Ab Anti-mouse 1:5000

Fig 2

Ad-HA-MAGEH1

"HRE+VIRUS"

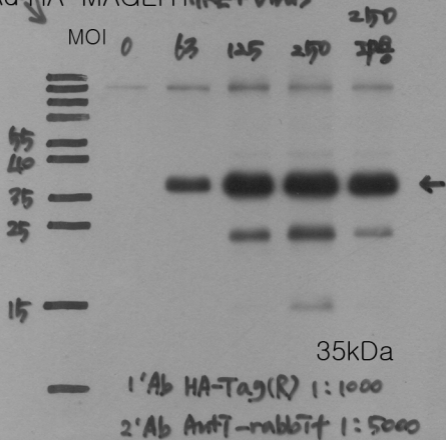

Fig 2

Ad-HA-MAGEH1

"HRE+VIRUS"

Normal

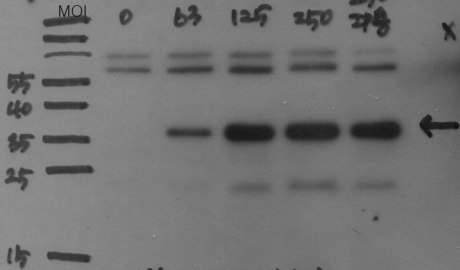

1°Ab MAGEH1 (R)

2°Ab Anti-rabbit

↓ size 35KDa

☆

Fig 2

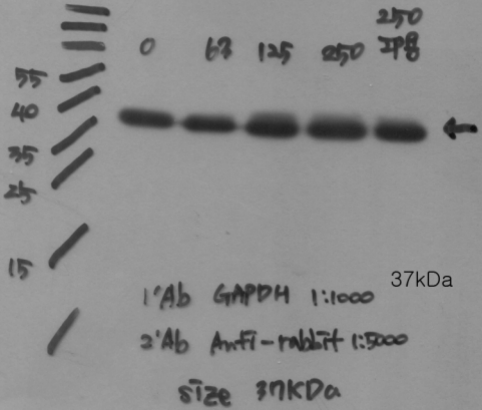

★ Fig 2

15sec

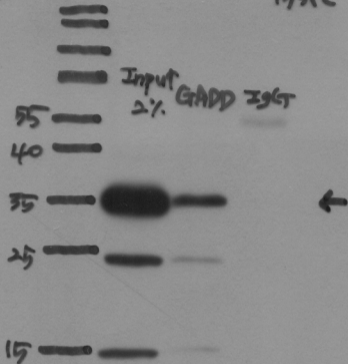

IP: GADD45Y

WB: HA-TAG

35kDa

1/5 ECL 40sec

Fig 2

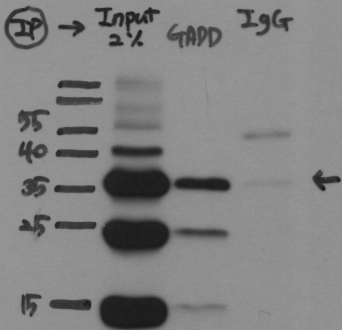

35 kDa

(WB) 1'Ab HA-Tag  
2'Ab Anti-rabbit

CsA 25 μg/ml (24h)

3rd - 2min (ECL)

\*

Fig 2

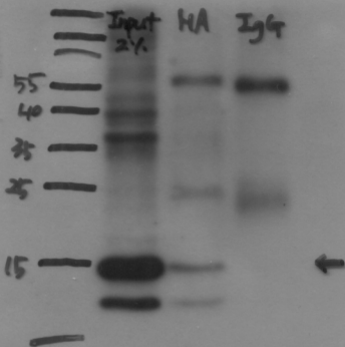

IP: HA-Tag HA-MAGEH1

WB: GADD45γ 17kda

<sup>1</sup>/9 ECL 30min

Fig 2

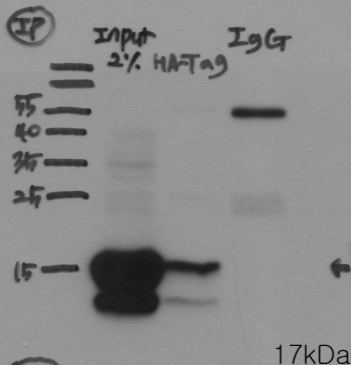

(WB) 1<sup>st</sup> Ab GAPDH  
2<sup>nd</sup> Ab Anti-mouse  
CsA 25 μg/ml (24h)



Fig 10

NC, sgCon; #2, sgMAGEH

2x Hyper 20min

size 17.19 kDa

CSA

CSA

NC #2 NC #2 NC #2 NC #2

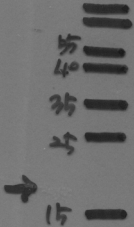

1'Ab cleaved caspase 3

2'Ab Anti-rabbit

17 & 19 kDa

Fig 10

NC,sgCon; #2,sgMAGEH

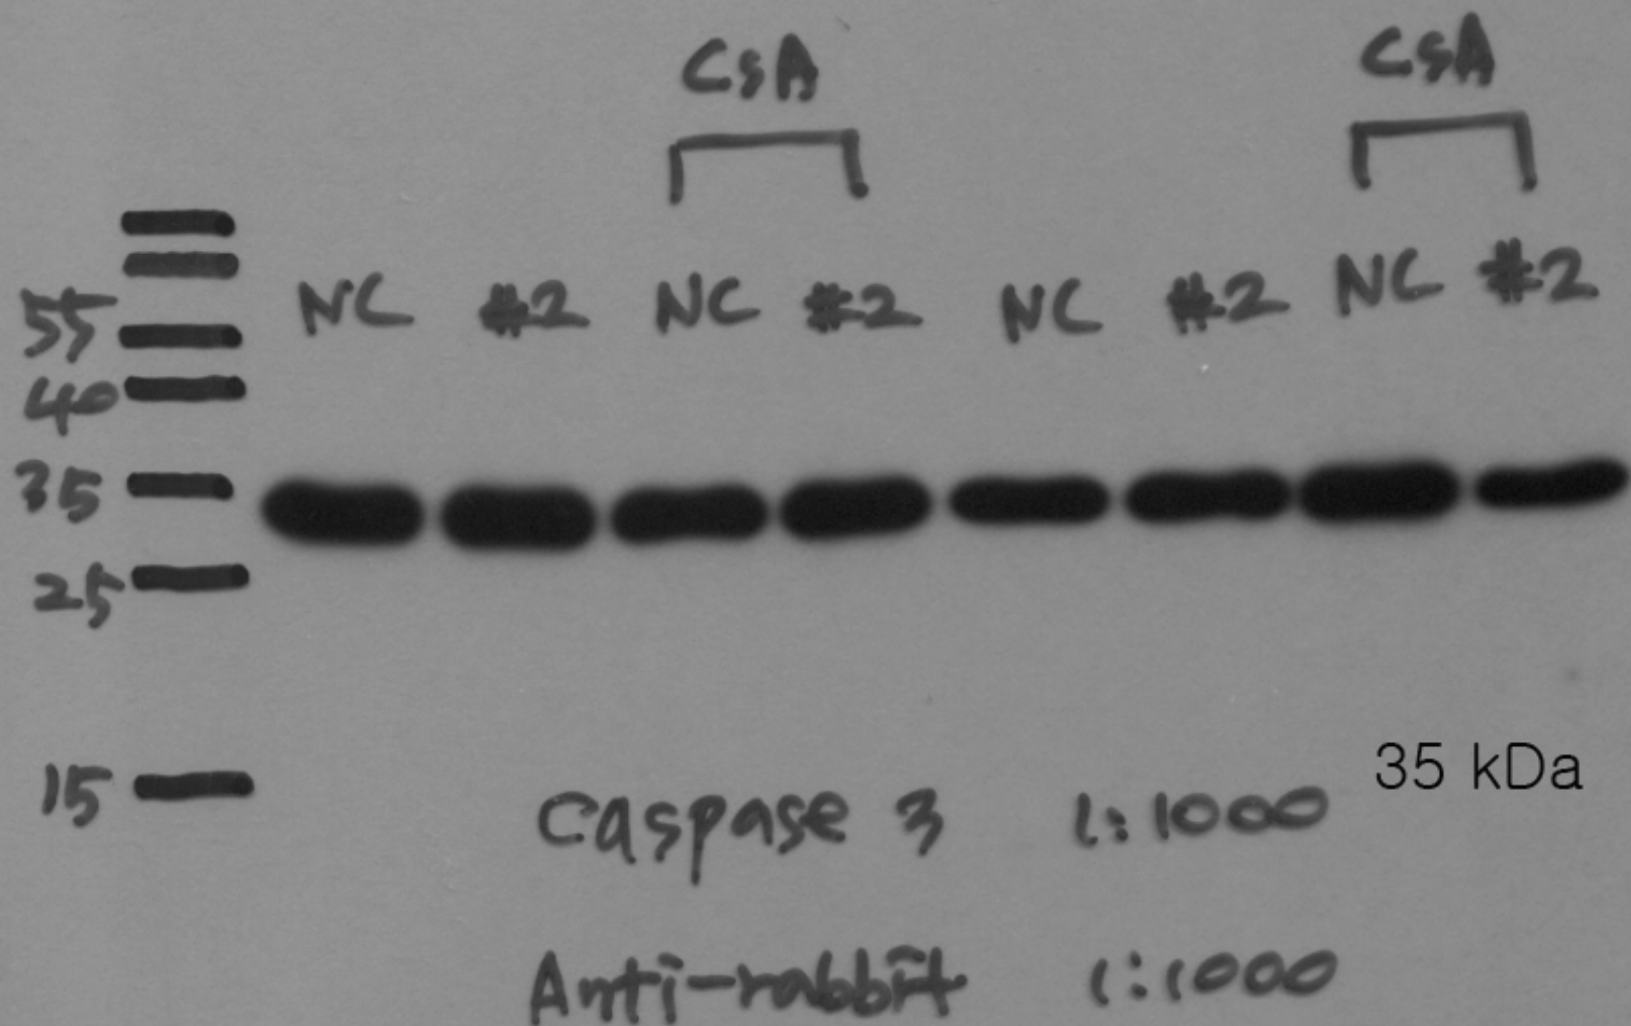

2/4 Hyper 3min

Fig 10

NC, sgCon; #2, sgMAGEH

\* size : 20kDa

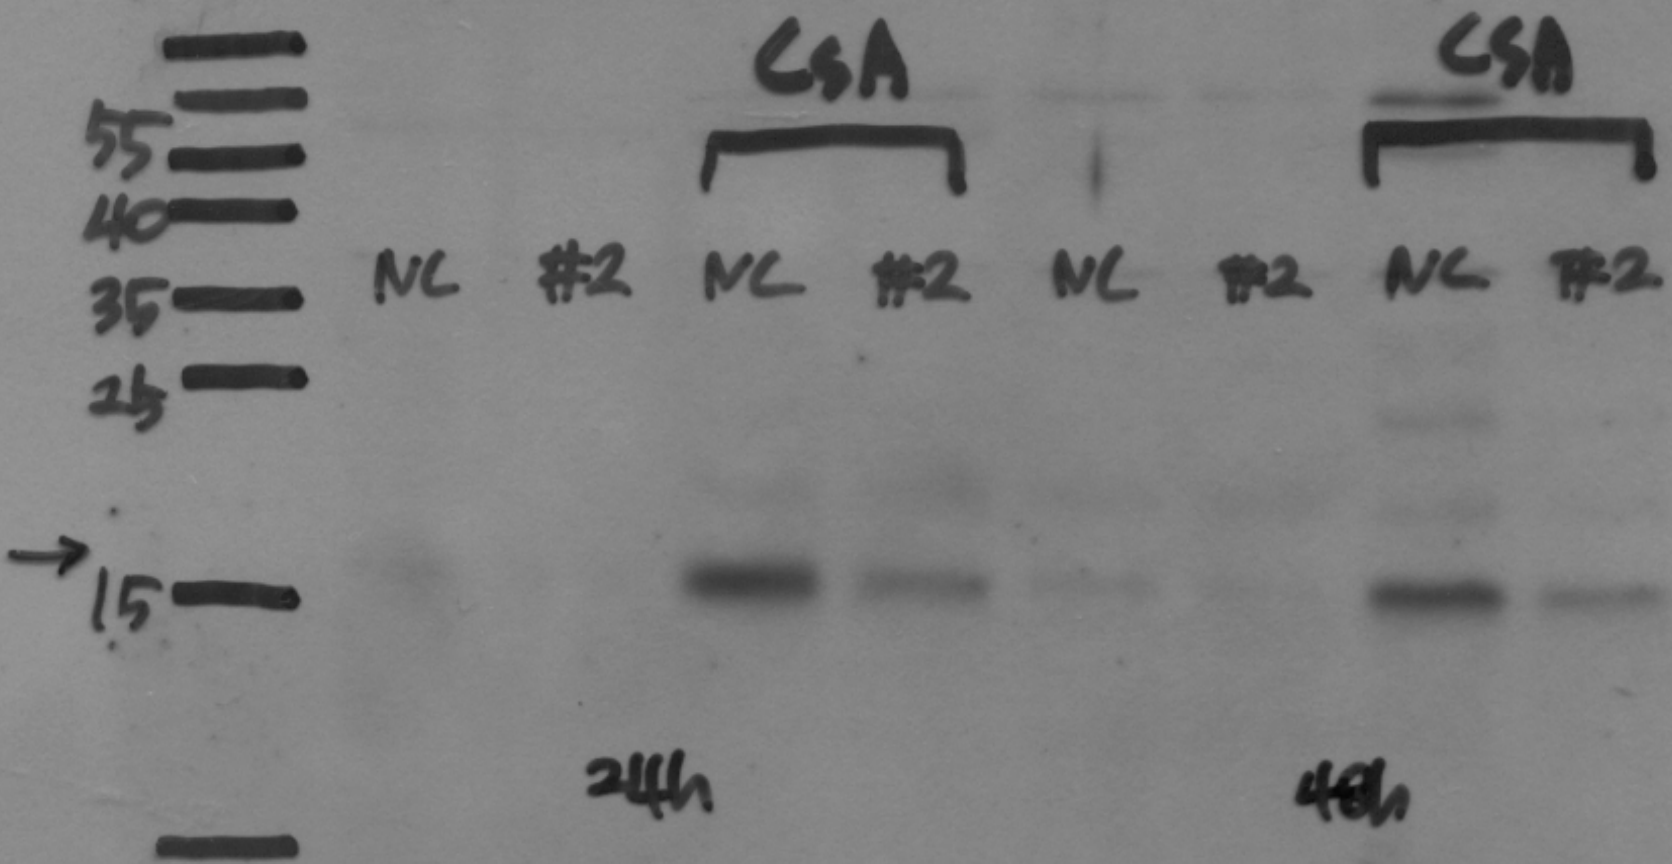

1 'Ab cleaved caspase'  
2 'Ab Anti - rabbit'

20 kDa

Fig 10

NC, sgCon; #2, sgMAGEH

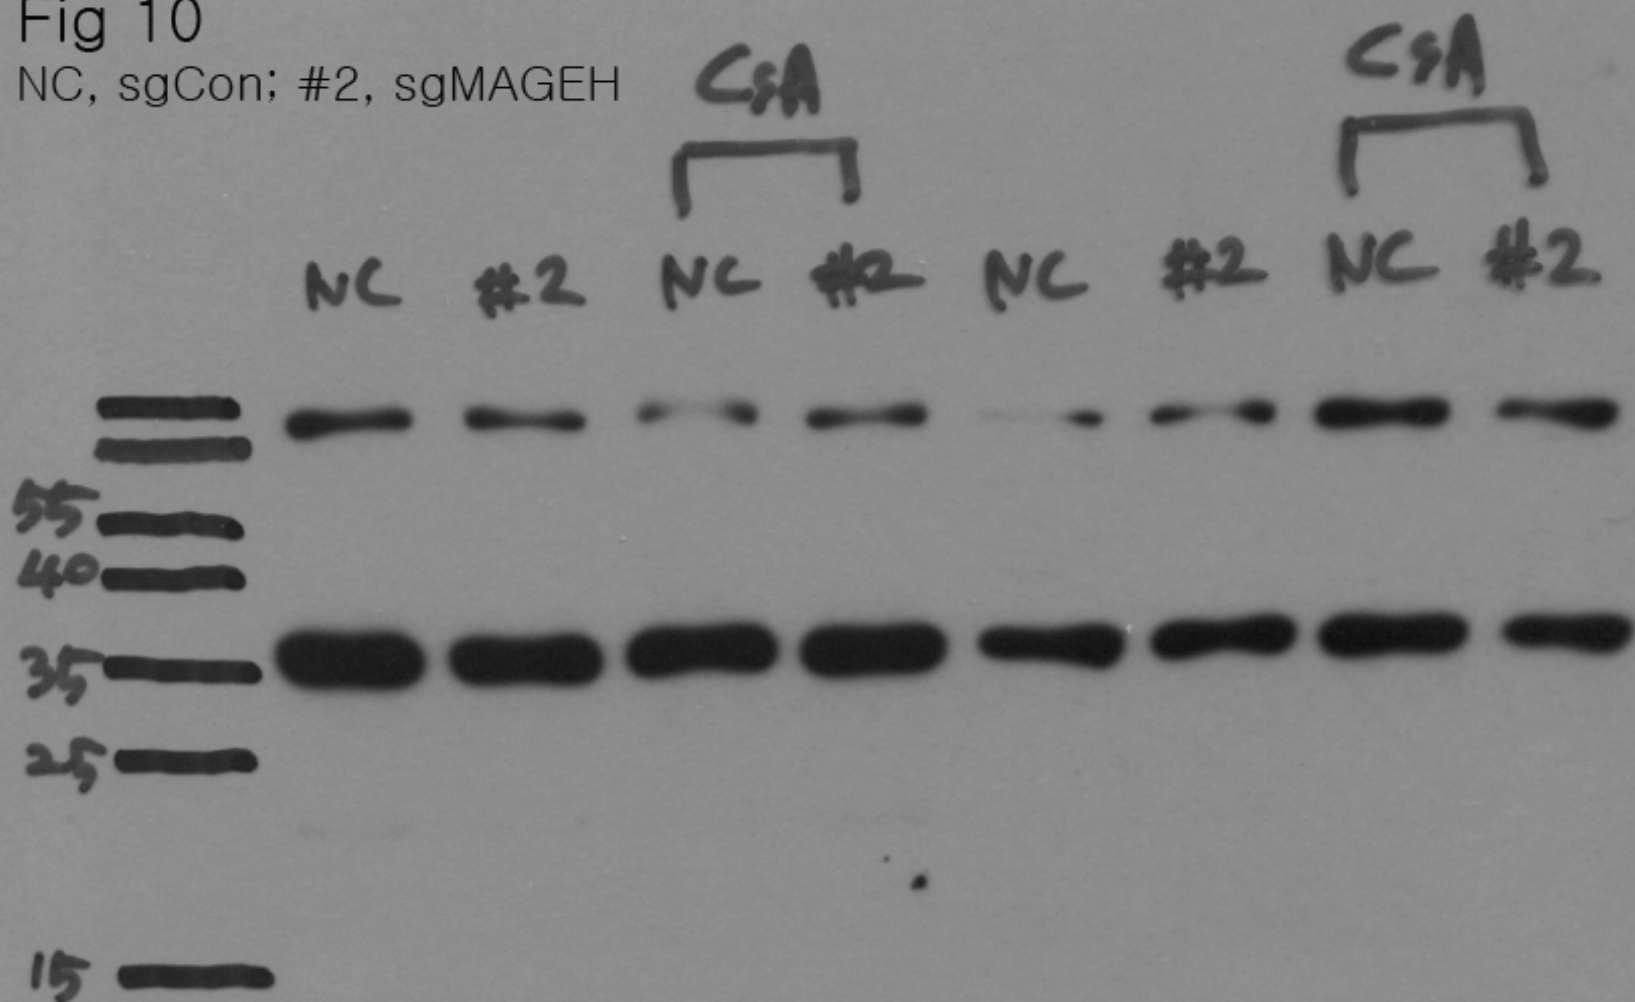

caspase 7 1:1000

35 kDa

Anti-rabbit 1:1000

ECL 5min

Fig 10

NC, sgCon; #2, sgMAGEH

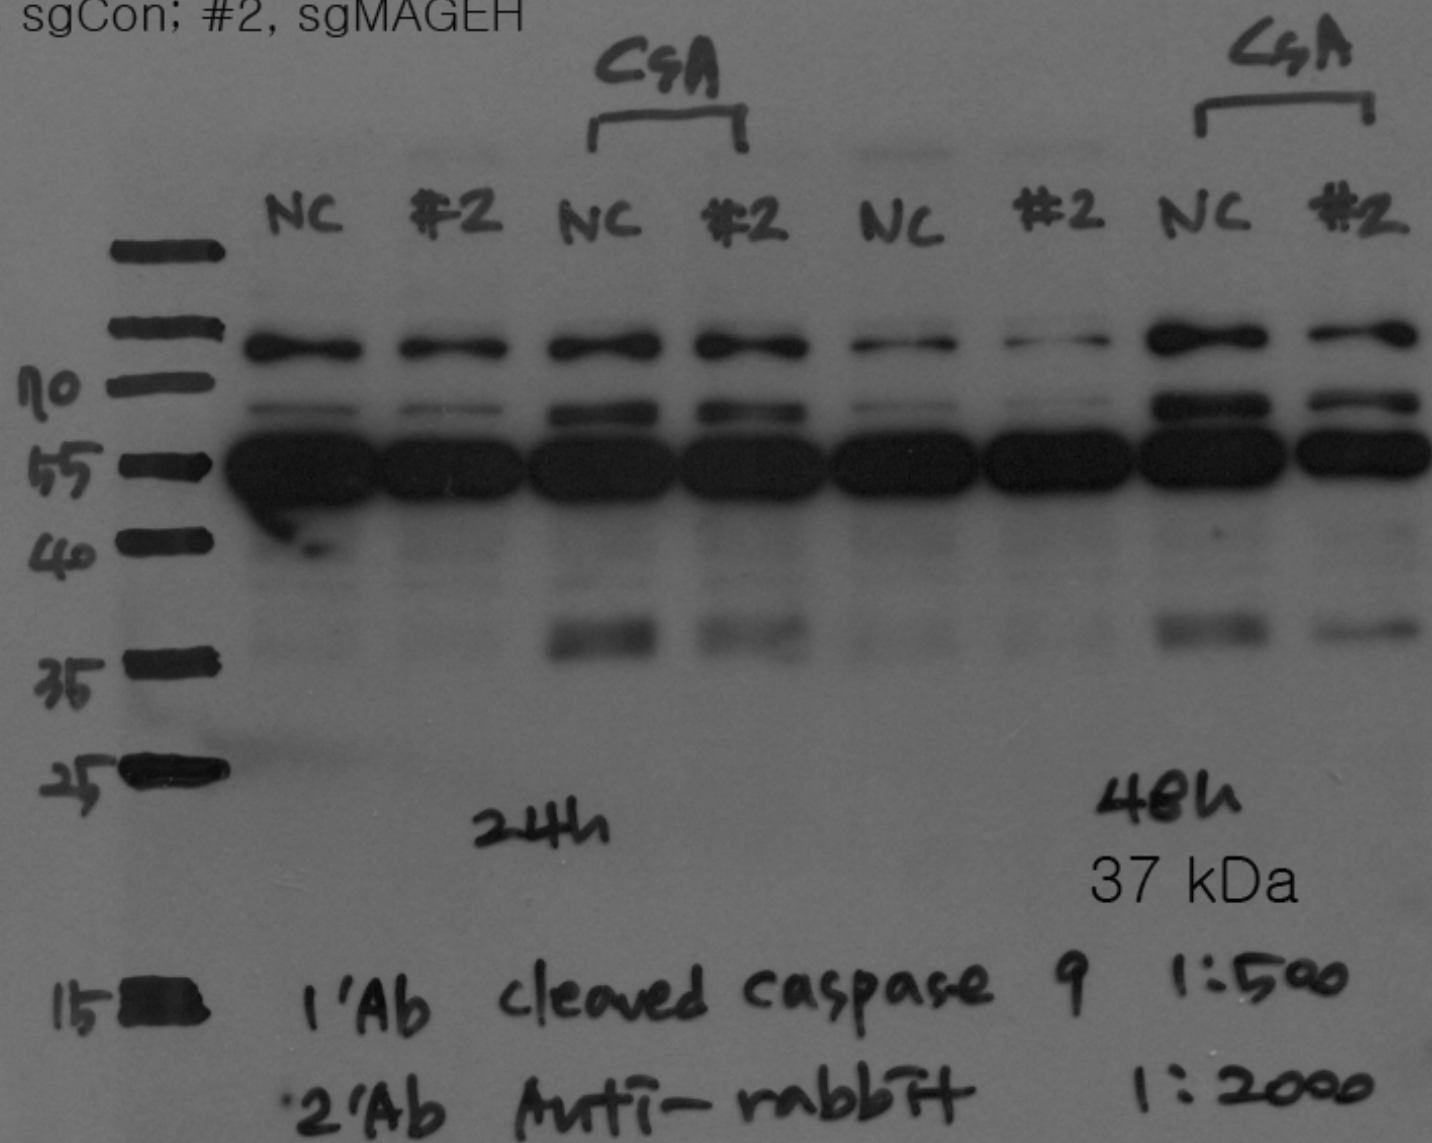

3min

Fig 10

NC, sgCon; #2, sgMAGEH

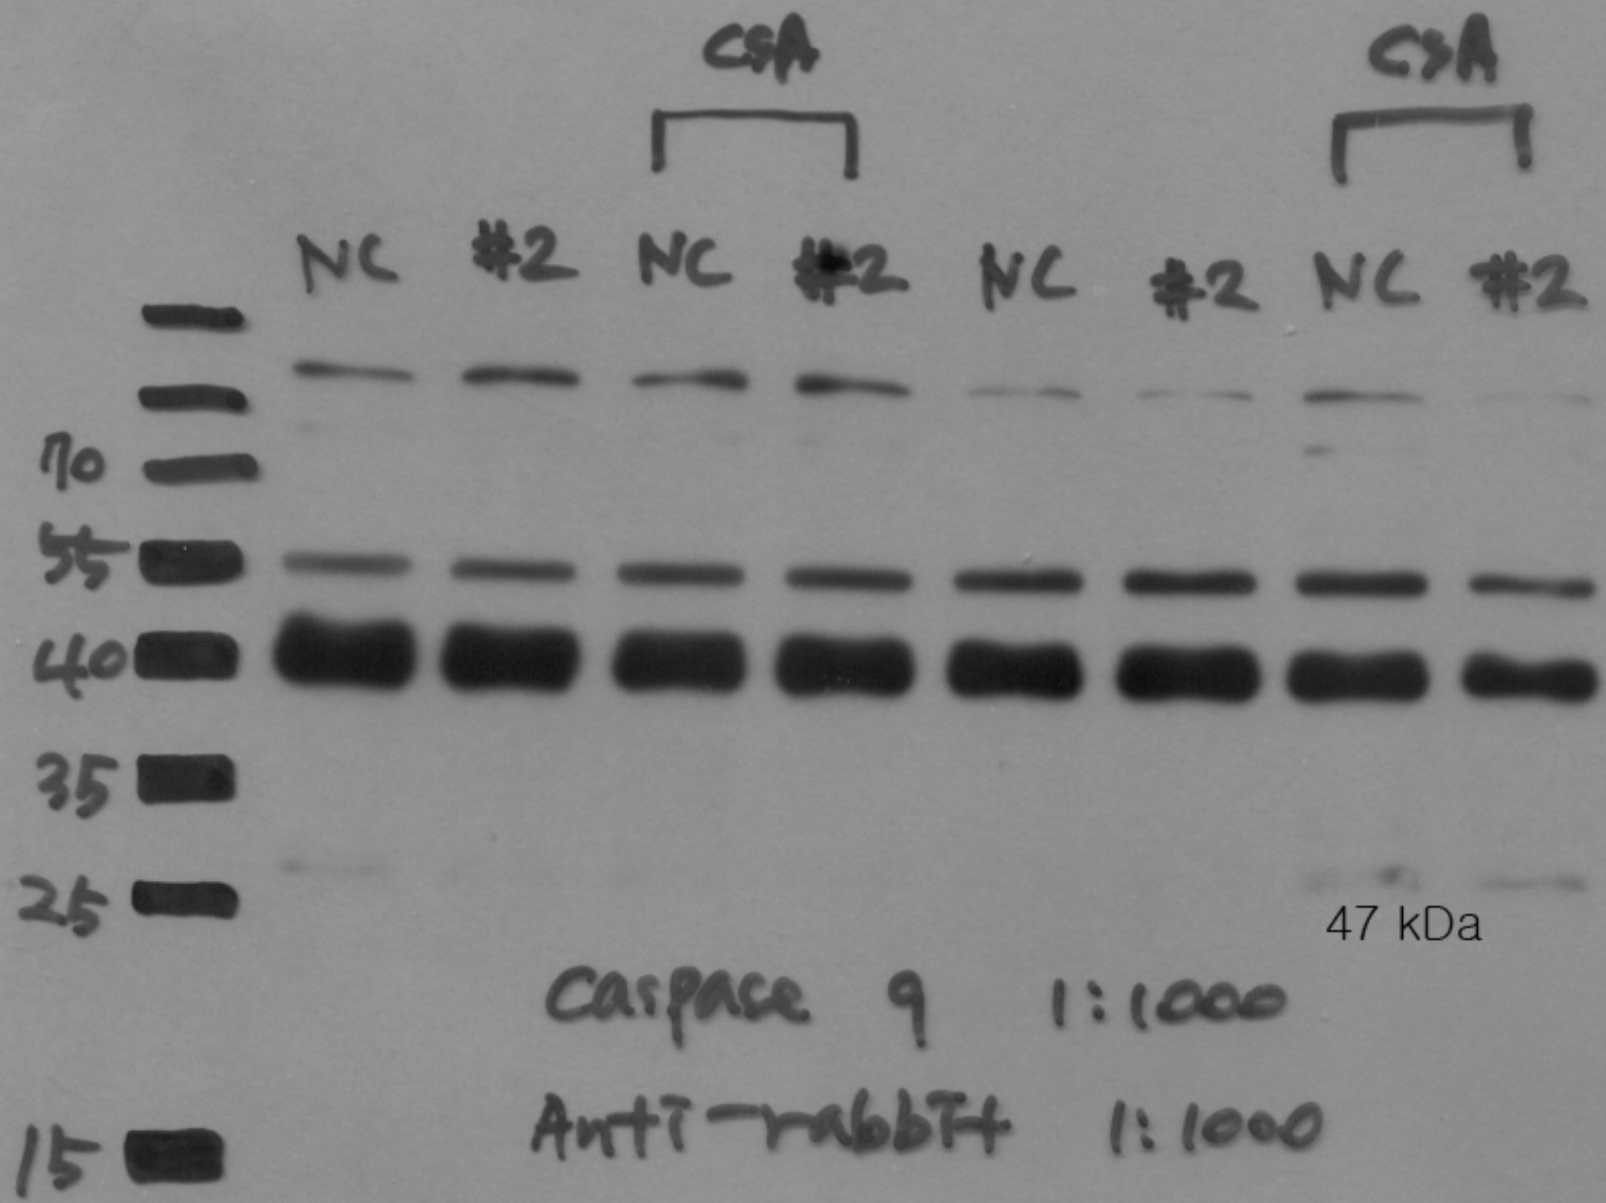

2/5 Hyper 3min

Fig 10

NC, sgCon; #2, sgMAGEH

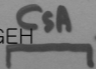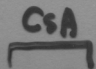

NC #2 NC #2 NC #2 NC #2

→ 55 —  
 40 —  
 35 —  
 25 —

24h

48h

15 —

1' Ab P-MLKL  
 2' Ab Anti-rabbit

size  
 54kDa

Fig 10

NC, sgCon; #2, sgMAGEH

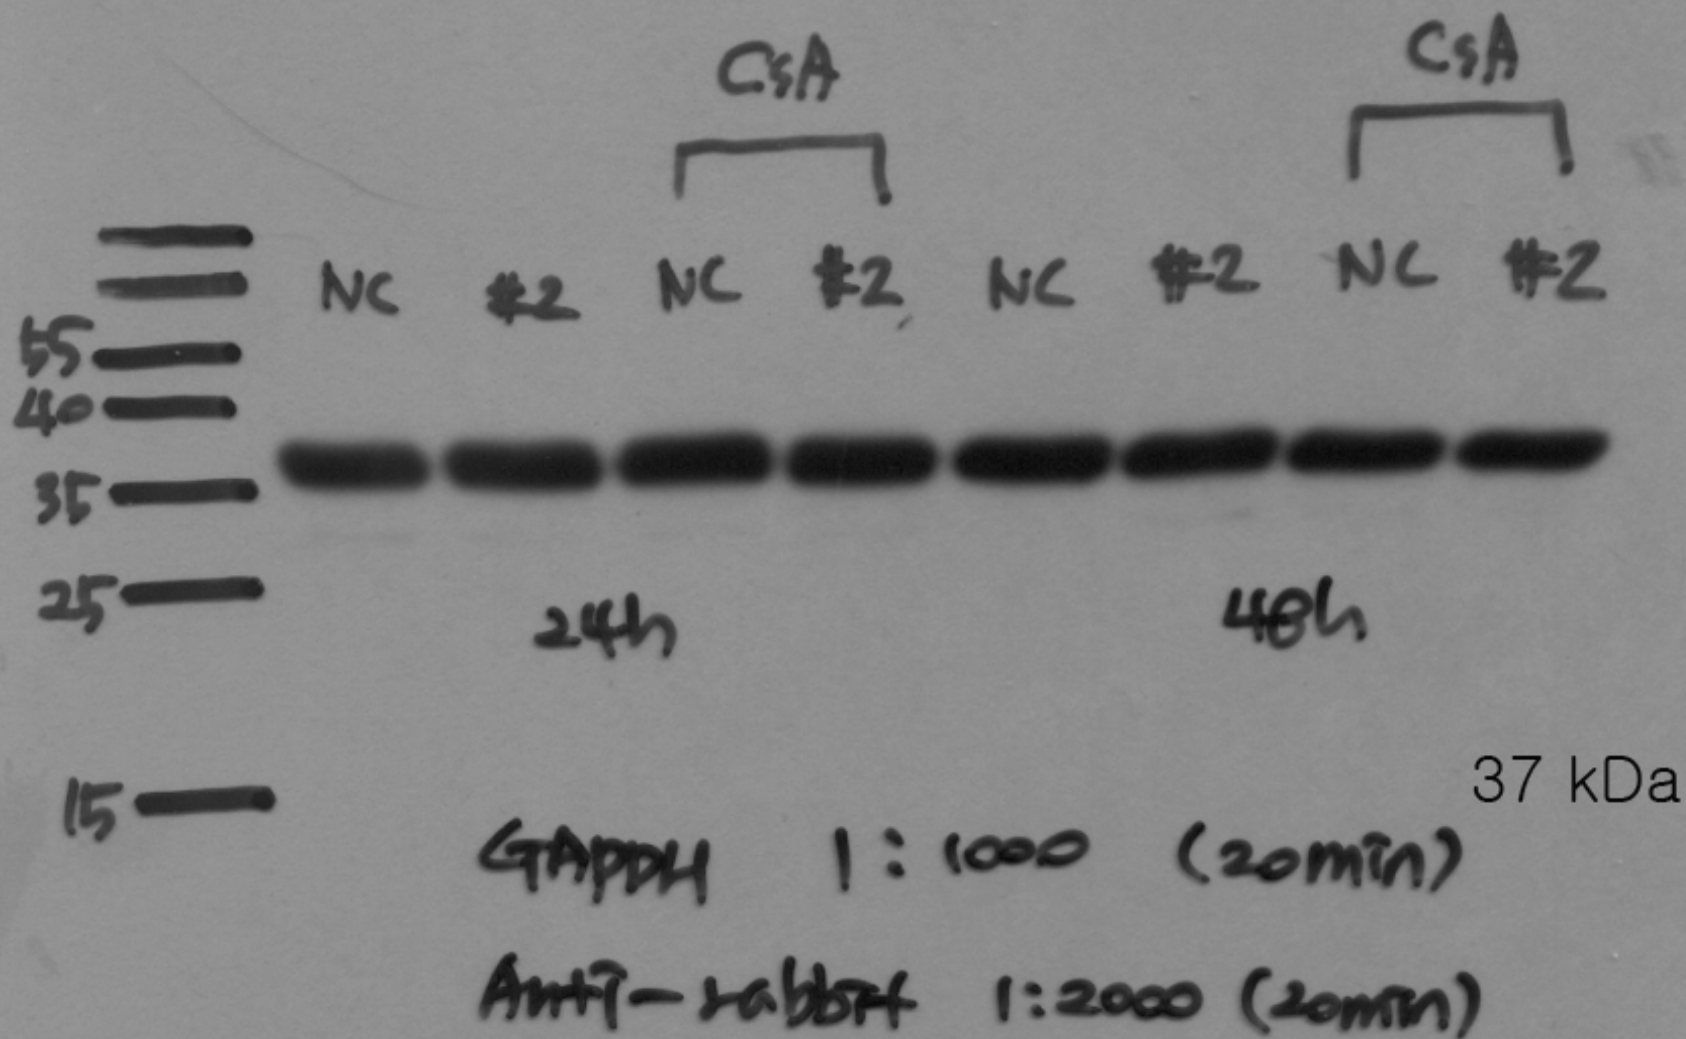



$\frac{2}{15}$  Hyper 2mita

Fig 11

NC, shCon; Clonel, shGADD

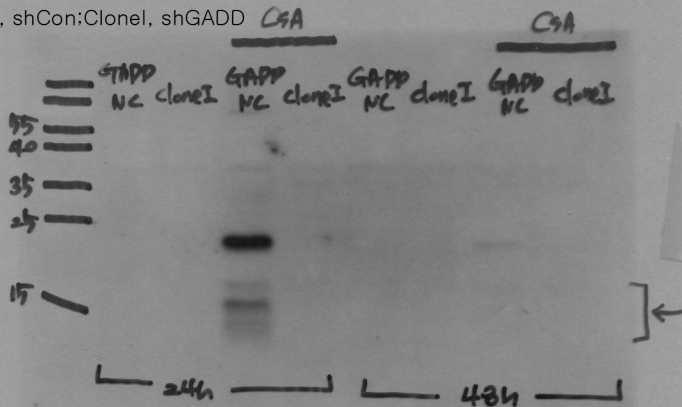

⊕ size : 17, 19 kDa

ECL 1min

Fig 11

NC, shCon; Clone1, shGADD

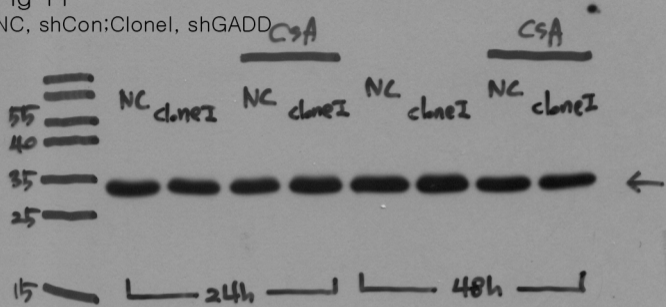

35kDa

\* caspase 3 : 17, 19, 35 kDa

1/5 Hyper 2mter

Fig 11

NC, shCon:Clone1, shGADD

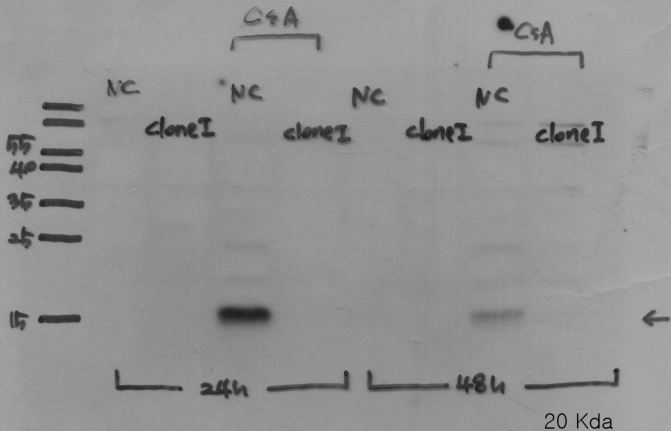

cleaved caspase 7 1:1000  
Anti-rabbit 1:2000

ECL 1min Fig 11

NC, shCon; Clone1, shGADD

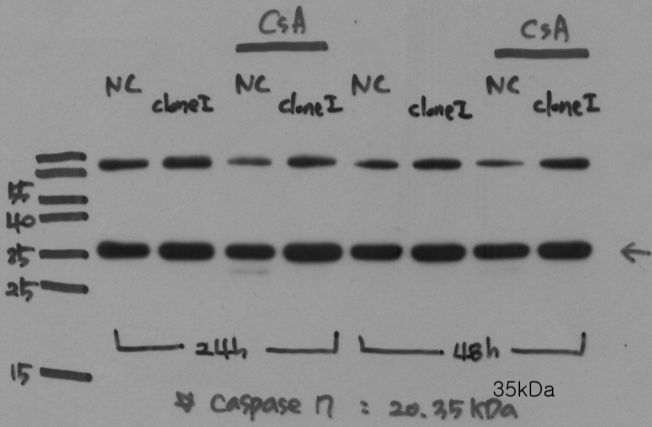

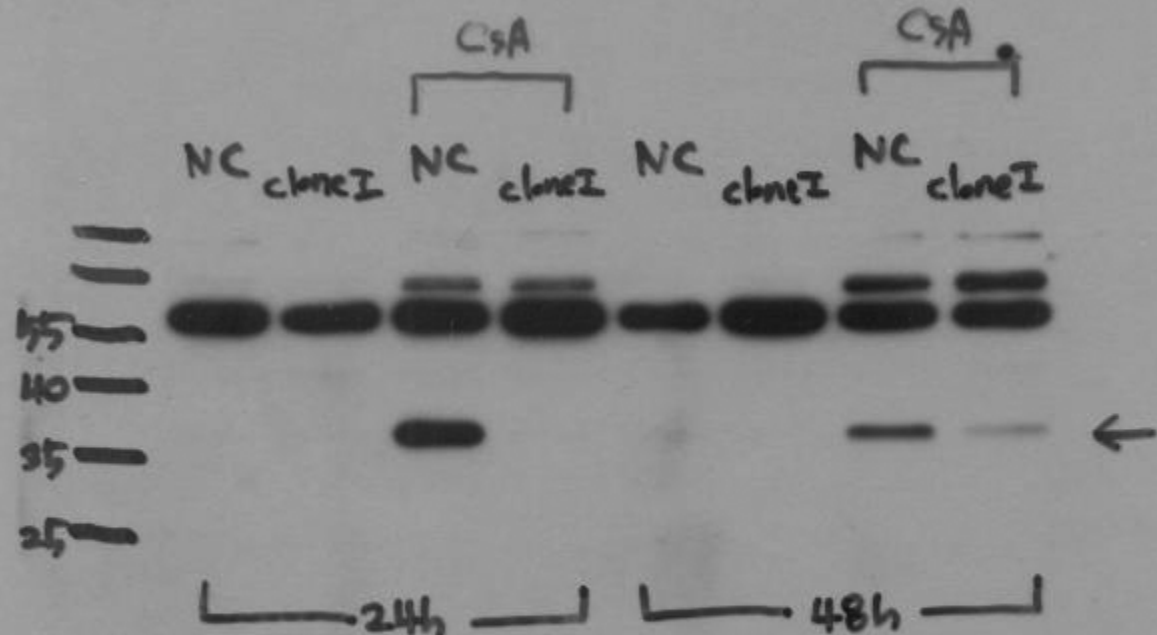

Fig 11

NC, shCon; Clone1, shGADD

37 kDa

↓ cleaved caspase 9 : 17.37 kDa

ECL 2min

Fig 11

NC, shCon; CloneI, shGADD

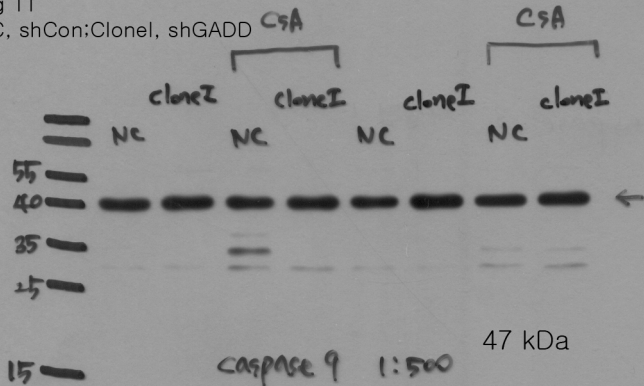

2/5 Hyper 20min

Fig 11

NC, shCon; Clone1, shGADD

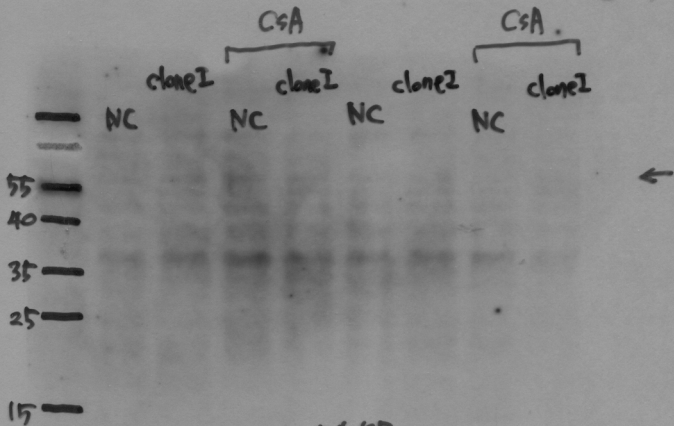

size : 54 kDa

P-MLKL 1 : 1000

ECL 10sec

Fig 11

NC, shCon; Clone1, shGADD

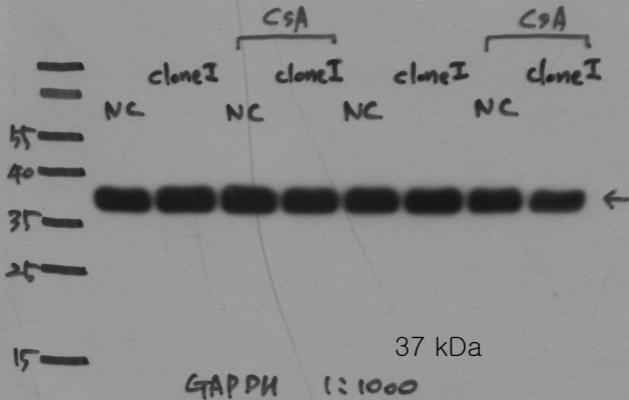



2/5 Hyper 1mTA

Fig 12  
siCon vs siMAGEH

NC siRNA

MAGEH1  
siRNA

0 12.5 25 0 12.5 25

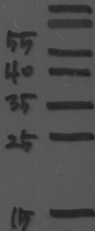

1'Ab cleaved caspase 3

17 & 19 KDa

2'Ab Anti-rabbit

\* CsA

ECL 1092C

★ C9A

Fig 12  
siCon vs siMAGEH

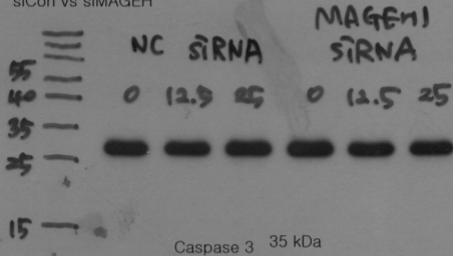

30 SEC

Fig 12

siCon vs siMAGEH1

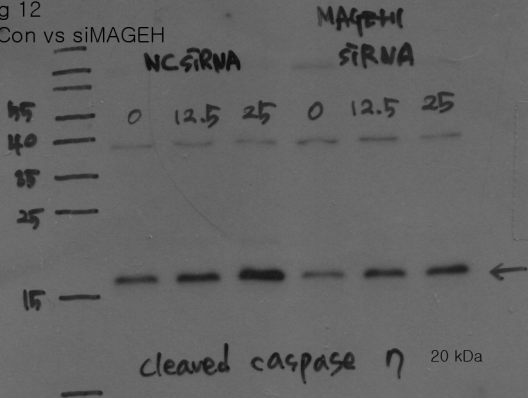

Fig 12

siCon vs siMAGEH1

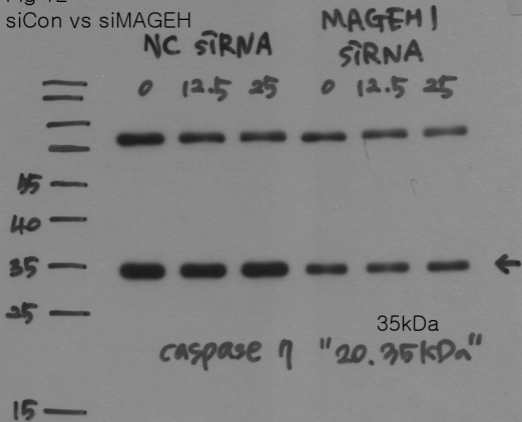

15 sec

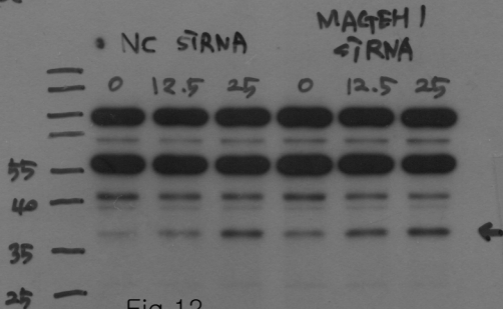

Fig 12

siCon vs siMAGEH

15 — cleaved caspase 9 37kDa

"17.3kDa"

\*CSA

Fig 12

siCon vs siMAGEH1

7sec

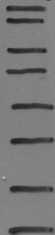

NC siRNA

MAGEH1  
siRNA

0 12.5 25 0 12.5 25

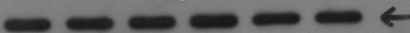

1'Ab caspase 9 1:1000 47 kDa

2'Ab Anti-rabbit 1:2000

"CSA"

Fig 12

siCon vs siMAGEH1

NC siRNA

MAGEH1 siRNA

0 12.5 25

0 12.5 25

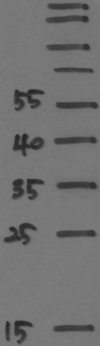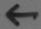

↓ p-MLKL

1 : 1000 54 kDa

\* CSA

Fig 12  
siCon vs siMAGEH1

5 sec

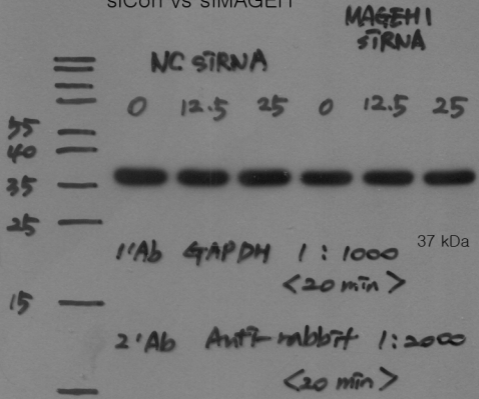



1/10 Hyper 10min

CSA

Fig 13

siCon, versus siGADD

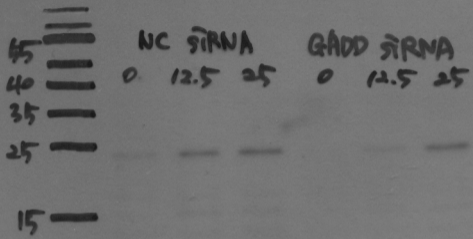

— Cleaved caspase 3

"size 17.19 kDa"

} ←

7sec

CSA

Fig 13

siCon, versus siGADD

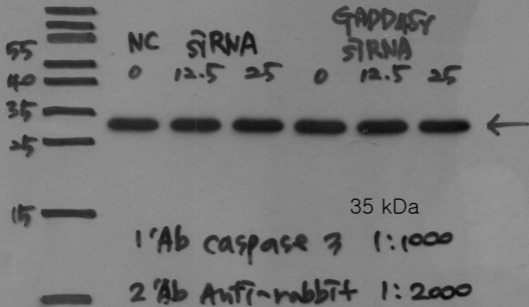

Fig 13

siCon, versus siGADD

←C9A

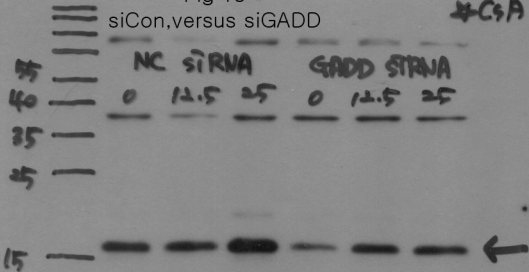

20kDa

1<sup>st</sup> Ab cleaved caspase 7 1:1000

2<sup>nd</sup> Ab Anti-rabbit 1:2000

Fig 13

siCon, versus siGADD

155RC

C9A

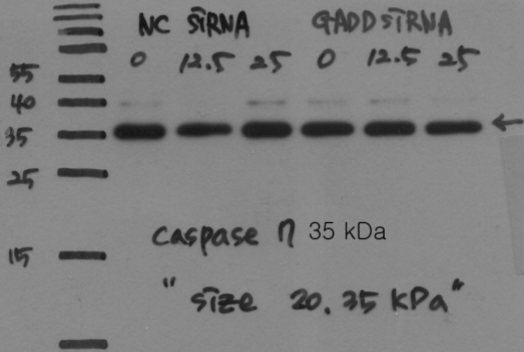

3min

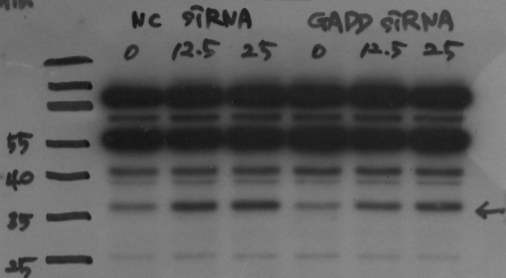

37 kDa

15 — cleaved caspase 9  $\Rightarrow$  1:500

Anti-rabbit  $\Rightarrow$  1:2000

Fig 13

siCon, versus siGADD

CSA

Fig 13

CSA

592C siCon, versus siGADD

GADD45 $\alpha$

NC siRNA

siRNA

0 12.5 25

0 12.5 25

55

40

35

25

15

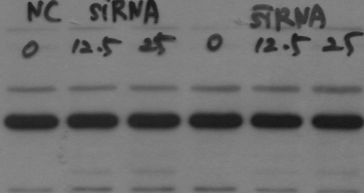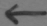

47 kDa

size

17. 35. 37. 47. kPa.  
~~~~~

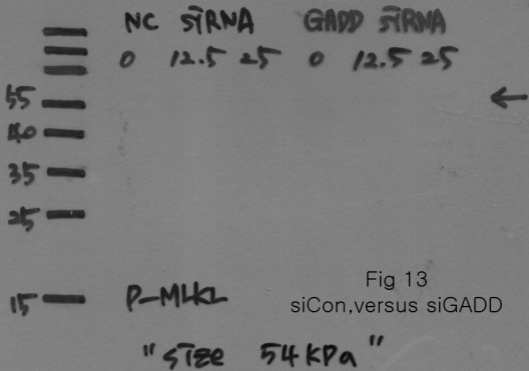

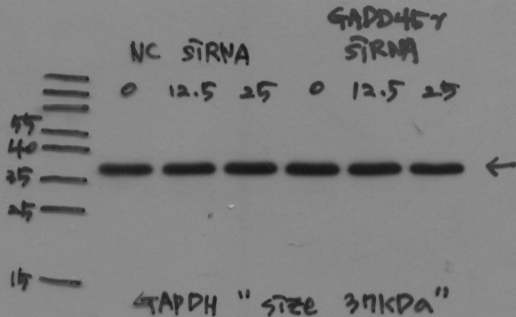

Fig 13  
siCon, versus siGADD
